# Supplementary material for: On a reported effect in ionospheric TEC around the time of the 6 April 2009 L'Aquila earthquake
Source: Copernicus journal article supplement (doi:10.5194/nhess-2017-39), 2017-02-16
Supplement: Supplementary file [file nhess-2017-39-SC1-supplement.pdf]

Due to my carelessness, there are some errors in the published discussion paper.

At page 5, rows 22 and 28  $\square$ DCP must be replaced with  $\Delta$ DCP.

At page 17, row 5  $\square\square$ DCP must be replaced with  $\Delta$ DCP.

I apologize for this oversight.

Sincerely,

Fabrizio Masci
